# Supplementary material
Source: PubMed Central journal article supplement (PMC7666900)
Supplement: nmaa081_supplemental_file.pdf [file nmaa081_supplemental_file.pdf]

**Small animal models of fibrosis in non-alcoholic steatohepatitis: are they reflecting human disease?**

David H Ipsen *et al.*

**Online Supplementary Material**

**Supplementary Material - Documentation for permission to re-use**

Permission to re-use was obtained for all relevant panels in Figure 1

**For A**

Reprinted from (14) with permission from Elsevier. Permission to re-use was granted via Copyright Clearance Center's RightsLink service (license number 4820111099693).

**For B and C**

Reprinted from (122). Permission was granted by direct communication with Wiley; Copyright© 2017 The Authors. Hepatology Communications published by Wiley Periodicals, Inc., on behalf of the American Association for the Study of Liver Diseases. This is an open access article under the terms of the Creative Commons Attribution-NonCommercial-NoDerivs License, which permits use and distribution in any medium, provided the original work is properly cited, the use is non-commercial and no modifications or adaptations are made.

**For D**

Reprinted from (50). This is an open access article distributed under the terms of the Creative Commons CC-BY license, which permits unrestricted use, distribution, and reproduction in any medium, provided the original work is properly cited.

**For F**

Reprinted from (45) with permission from Elsevier. Permission to re-use was granted via Copyright Clearance Center's RightsLink service (license number 4820100846776).

**Reference**

14. Bedossa P. Histological Assessment of NAFLD. *Dig Dis Sci* 2016;61(5):1348-55.
45. Briand F, Brousseau E, Quinsat M, Burcelin R, Sulpice T. Obeticholic acid raises LDL-cholesterol and reduces HDL-cholesterol in the Diet-Induced NASH (DIN) hamster model. *Eur J Pharmacol* 2018;818:449-56.
50. Asgharpour A, Cazanave SC, Pacana T, Seneshaw M, Vincent R, Banini BA, Kumar DP, Daita K, Min HK, Mirshahi F, et al. A diet-induced animal model of non-alcoholic fatty liver disease and hepatocellular cancer. *J Hepatol* 2016;65(3):579-88.
122. Masugi Y, Abe T, Tsujikawa H, Effendi K, Hashiguchi A, Abe M, Imai Y, Hino K, Hige S, Kawanaka M, et al. Quantitative assessment of liver fibrosis reveals a nonlinear association with fibrosis stage in nonalcoholic fatty liver disease. *Hepatol Commun* 2018;2(1):58-68.

The personal communications with Wiley and the RightLinks Licenses are given below.

SPRINGER NATURE LICENSE  
TERMS AND CONDITIONS

May 01, 2020

---



---

This Agreement between University of Copenhagen -- Pernille Tveden-Nyborg ("You") and Springer Nature ("Springer Nature") consists of your license details and the terms and conditions provided by Springer Nature and Copyright Clearance Center.

**All payments must be made in full to CCC. For payment instructions, please see information listed at the bottom of this form.**

|                                                                                               |                                           |
|-----------------------------------------------------------------------------------------------|-------------------------------------------|
| License Number                                                                                | 4820111099693                             |
| License date                                                                                  | May 01, 2020                              |
| Licensed Content Publisher                                                                    | Springer Nature                           |
| Licensed Content Publication                                                                  | Digestive Diseases and Sciences           |
| Licensed Content Title                                                                        | Histological Assessment of NAFLD          |
| Licensed Content Author                                                                       | Pierre Bedossa                            |
| Licensed Content Date                                                                         | Feb 13, 2016                              |
| Type of Use                                                                                   | Journal/Magazine                          |
| Requestor type                                                                                | academic/university or research institute |
| Is this reuse sponsored by or associated with a pharmaceutical or a medical products company? | no                                        |
| Format                                                                                        | print and electronic                      |
| Portion                                                                                       | figures/tables/illustrations              |

|                                        |                                                                                                                               |
|----------------------------------------|-------------------------------------------------------------------------------------------------------------------------------|
| Number of figures/tables/illustrations | 1                                                                                                                             |
| Will you be translating?               | no                                                                                                                            |
| Circulation/distribution               | 50000 or greater                                                                                                              |
| Author of this Springer Nature content | no                                                                                                                            |
| Title of new article                   | Small animal models of fibrosis in non-alcoholic steatohepatitis: are they reflecting human disease?                          |
| Lead author                            | David Højland Ipsen                                                                                                           |
| Title of targeted journal              | Advances in Nutrition                                                                                                         |
| Publisher                              | Oxford University Press                                                                                                       |
| Expected publication date              | Jun 2020                                                                                                                      |
| Portions                               | Figure 6, page 1352, Bottom left column                                                                                       |
| Requestor Location                     | University of Copenhagen<br>Ridebanevej 9<br><br>Frederiksberg, Hovedstaden 1870<br>Denmark<br>Attn: University of Copenhagen |
| Billing Type                           | Credit Card                                                                                                                   |
| Credit card info                       | Master Card ending in 6494                                                                                                    |
| Credit card expiration                 | 02/2021                                                                                                                       |
| Total                                  | 95.93 EUR                                                                                                                     |
| Terms and Conditions                   |                                                                                                                               |

**Springer Nature Customer Service Centre GmbH**  
**Terms and Conditions**

This agreement sets out the terms and conditions of the licence (the **Licence**) between you and **Springer Nature Customer Service Centre GmbH** (the **Licensor**). By clicking 'accept' and completing the transaction for the material (**Licensed Material**), you also confirm your acceptance of these terms and conditions.

## 1. Grant of Licence

**1. 1.** The Licensor grants you a personal, non-exclusive, non-transferable, world-wide licence to reproduce the Licensed Material for the purpose specified in your order only. Licences are granted for the specific use requested in the order and for no other use, subject to the conditions below.

**1. 2.** The Licensor warrants that it has, to the best of its knowledge, the rights to license reuse of the Licensed Material. However, you should ensure that the material you are requesting is original to the Licensor and does not carry the copyright of another entity (as credited in the published version).

**1. 3.** If the credit line on any part of the material you have requested indicates that it was reprinted or adapted with permission from another source, then you should also seek permission from that source to reuse the material.

## 2. Scope of Licence

**2. 1.** You may only use the Licensed Content in the manner and to the extent permitted by these Ts&Cs and any applicable laws.

**2. 2.** A separate licence may be required for any additional use of the Licensed Material, e.g. where a licence has been purchased for print only use, separate permission must be obtained for electronic re-use. Similarly, a licence is only valid in the language selected and does not apply for editions in other languages unless additional translation rights have been granted separately in the licence. Any content owned by third parties are expressly excluded from the licence.

**2. 3.** Similarly, rights for additional components such as custom editions and derivatives require additional permission and may be subject to an additional fee.

Please apply to

[Journalpermissions@springernature.com](mailto:Journalpermissions@springernature.com)/[bookpermissions@springernature.com](mailto:bookpermissions@springernature.com) for these rights.

**2. 4.** Where permission has been granted **free of charge** for material in print, permission may also be granted for any electronic version of that work, provided that the material is incidental to your work as a whole and that the electronic version is essentially equivalent to, or substitutes for, the print version.

**2. 5.** An alternative scope of licence may apply to signatories of the [STM Permissions Guidelines](#), as amended from time to time.

## 3. Duration of Licence

**3. 1.** A licence for is valid from the date of purchase ('Licence Date') at the end of the relevant period in the below table:

| Scope of Licence  | Duration of Licence |
|-------------------|---------------------|
| Post on a website | 12 months           |
| Presentations     | 12 months           |

|                    |                                                   |
|--------------------|---------------------------------------------------|
| Books and journals | Lifetime of the edition in the language purchased |
|--------------------|---------------------------------------------------|

#### 4. Acknowledgement

4. 1. The Licensor's permission must be acknowledged next to the Licenced Material in print. In electronic form, this acknowledgement must be visible at the same time as the figures/tables/illustrations or abstract, and must be hyperlinked to the journal/book's homepage. Our required acknowledgement format is in the Appendix below.

#### 5. Restrictions on use

5. 1. Use of the Licensed Material may be permitted for incidental promotional use and minor editing privileges e.g. minor adaptations of single figures, changes of format, colour and/or style where the adaptation is credited as set out in Appendix 1 below. Any other changes including but not limited to, cropping, adapting, omitting material that affect the meaning, intention or moral rights of the author are strictly prohibited.

5. 2. You must not use any Licensed Material as part of any design or trademark.

5. 3. Licensed Material may be used in Open Access Publications (OAP) before publication by Springer Nature, but any Licensed Material must be removed from OAP sites prior to final publication.

#### 6. Ownership of Rights

6. 1. Licensed Material remains the property of either Licensor or the relevant third party and any rights not explicitly granted herein are expressly reserved.

#### 7. Warranty

IN NO EVENT SHALL LICENSOR BE LIABLE TO YOU OR ANY OTHER PARTY OR ANY OTHER PERSON OR FOR ANY SPECIAL, CONSEQUENTIAL, INCIDENTAL OR INDIRECT DAMAGES, HOWEVER CAUSED, ARISING OUT OF OR IN CONNECTION WITH THE DOWNLOADING, VIEWING OR USE OF THE MATERIALS REGARDLESS OF THE FORM OF ACTION, WHETHER FOR BREACH OF CONTRACT, BREACH OF WARRANTY, TORT, NEGLIGENCE, INFRINGEMENT OR OTHERWISE (INCLUDING, WITHOUT LIMITATION, DAMAGES BASED ON LOSS OF PROFITS, DATA, FILES, USE, BUSINESS OPPORTUNITY OR CLAIMS OF THIRD PARTIES), AND WHETHER OR NOT THE PARTY HAS BEEN ADVISED OF THE POSSIBILITY OF SUCH DAMAGES. THIS LIMITATION SHALL APPLY NOTWITHSTANDING ANY FAILURE OF ESSENTIAL PURPOSE OF ANY LIMITED REMEDY PROVIDED HEREIN.

#### 8. Limitations

8. 1. **BOOKS ONLY**: Where 'reuse in a dissertation/thesis' has been selected the following terms apply: Print rights of the final author's accepted manuscript (for clarity, NOT the published version) for up to 100 copies, electronic rights for use only on a

personal website or institutional repository as defined by the Sherpa guideline ([www.sherpa.ac.uk/romeo/](http://www.sherpa.ac.uk/romeo/)).

## 9. Termination and Cancellation

9. 1. Licences will expire after the period shown in Clause 3 (above).

9. 2. Licensee reserves the right to terminate the Licence in the event that payment is not received in full or if there has been a breach of this agreement by you.

### **Appendix 1 — Acknowledgements:**

#### **For Journal Content:**

Reprinted by permission from [the Licensor]: [Journal Publisher (e.g. Nature/Springer/Palgrave)] [JOURNAL NAME] [REFERENCE CITATION (Article name, Author(s) Name), [COPYRIGHT] (year of publication)]

#### **For Advance Online Publication papers:**

Reprinted by permission from [the Licensor]: [Journal Publisher (e.g. Nature/Springer/Palgrave)] [JOURNAL NAME] [REFERENCE CITATION (Article name, Author(s) Name), [COPYRIGHT] (year of publication), advance online publication, day month year (doi: 10.1038/sj.[JOURNAL ACRONYM].)]

#### **For Adaptations/Translations:**

Adapted/Translated by permission from [the Licensor]: [Journal Publisher (e.g. Nature/Springer/Palgrave)] [JOURNAL NAME] [REFERENCE CITATION (Article name, Author(s) Name), [COPYRIGHT] (year of publication)]

#### **Note: For any republication from the British Journal of Cancer, the following credit line style applies:**

Reprinted/adapted/translated by permission from [the Licensor]: on behalf of Cancer Research UK: : [Journal Publisher (e.g. Nature/Springer/Palgrave)] [JOURNAL NAME] [REFERENCE CITATION (Article name, Author(s) Name), [COPYRIGHT] (year of publication)]

#### **For Advance Online Publication papers:**

Reprinted by permission from The [the Licensor]: on behalf of Cancer Research UK: [Journal Publisher (e.g. Nature/Springer/Palgrave)] [JOURNAL NAME] [REFERENCE CITATION (Article name, Author(s) Name), [COPYRIGHT] (year of publication), advance online publication, day month year (doi: 10.1038/sj.[JOURNAL ACRONYM].)]

#### **For Book content:**

Reprinted/adapted by permission from [the Licensor]: [Book Publisher (e.g. Palgrave Macmillan, Springer etc)] [Book Title] by [Book author(s)] [COPYRIGHT] (year of publication)]

### **Other Conditions:**

Version 1.2

Questions? [customercare@copyright.com](mailto:customercare@copyright.com) or +1-855-239-3415 (toll free in the US) or +1-978-646-2777.

---

---



## David Højland Ipsen

---

**Fra:** Wiley Global Permissions <permissions@wiley.com>  
**Sendt:** 11. februar 2020 17:41  
**Til:** David Højland Ipsen  
**Emne:** FW: Request for permission

**Prioritet:** Høj

**Opfølgningsflag:** Opfølgning  
**Flagstatus:** Afmærket

Dear David,

Thank you for your email.

Permission is hereby granted for the use requested subject to the usual acknowledgements (author, title of material, title of journal, ourselves as publisher). You should also duplicate the copyright notice that appears in the Wiley publication; this can be found on the copyright page in the journal.

Any third party material is expressly excluded from this permission. If any of the material you wish to use appears within our work with credit to another source, authorization from that source must be obtained.

This permission does not include the right to grant others permission to photocopy or otherwise reproduce this material except for accessible versions made by non-profit organizations serving the blind, visually impaired and other persons with print disabilities (VIPs).

Sincerely,

[Sheik Safdar](#)  
Sales Specialist – Permissions  
Global Sales Partnerships  
**Wiley**

[ssafdar@wiley.com](mailto:ssafdar@wiley.com)  
T +1 201-748-6512

111 River Street  
Hoboken, NJ 07030-5774  
U.S.  
[permissions@wiley.com](mailto:permissions@wiley.com)

**WILEY**

---

**From:** David Højland Ipsen <[dhi@sund.ku.dk](mailto:dhi@sund.ku.dk)>  
**Sent:** Wednesday, 05 February, 2020 14:24  
**To:** Bak, Mie <[mbak@wiley.com](mailto:mbak@wiley.com)>  
**Cc:** Pernille Tveden-Nyborg <[ptn@sund.ku.dk](mailto:ptn@sund.ku.dk)>  
**Subject:** Request for permission

Hej,

Vi snakkede for kort tid sammen vedr. re-use af nogle figurer til en artikel som vi gerne vil submitte.  
Som lovet en beskrivelse af situationen:

We would like to use two pictures from Masugi et al 2018; Hepatology Communications; 2, pp 58-68; Figure 2D and 2E (page 63). The pictures will be slightly cropped, but no additional changes will be made. The cropped images do not alter the information contained in the original figure. We will cite the authors as part of the figure legend including "modified from...". The pictures will be used as panels in a larger figure containing examples of hepatic histopathology, included in a review article expected for submission to Journal of Gastroenterology.

REF = Hepatol Commun. 2017 Nov 27;2(1):58-68. doi: 10.1002/hep4.1121. eCollection 2018 Jan  
Link to REF = <https://aasldpubs.onlinelibrary.wiley.com/doi/full/10.1002/hep4.1121>

Hvis du mangler mere information, må du endelig sige til.

Tusind tak for hjælpen,

Mange hilsner,  
David

**David Højland Ipsen.**  
Postdoc, PhD.

**Faculty of Health and Medical Sciences**  
Department of Veterinary and Animal Sciences, Section of Experimental Animal Models  
University of Copenhagen  
Ridebanevej 9, 1870 Frederiksberg, Copenhagen

DIR 26 80 52 01  
[dhi@sund.ku.dk](mailto:dhi@sund.ku.dk)

ELSEVIER LICENSE  
TERMS AND CONDITIONS

May 01, 2020

---



---

This Agreement between University of Copenhagen -- Pernille Tveden-Nyborg ("You") and Elsevier ("Elsevier") consists of your license details and the terms and conditions provided by Elsevier and Copyright Clearance Center.

|                              |                                                                                                                  |
|------------------------------|------------------------------------------------------------------------------------------------------------------|
| License Number               | 4820100846776                                                                                                    |
| License date                 | May 01, 2020                                                                                                     |
| Licensed Content Publisher   | Elsevier                                                                                                         |
| Licensed Content Publication | European Journal of Pharmacology                                                                                 |
| Licensed Content Title       | Obeticholic acid raises LDL-cholesterol and reduces HDL-cholesterol in the Diet-Induced NASH (DIN) hamster model |
| Licensed Content Author      | François Briand,Emmanuel Brousseau,Marjolaine Quinsat,Rémy Burcelin,Thierry Sulpice                              |
| Licensed Content Date        | Jan 5, 2018                                                                                                      |
| Licensed Content Volume      | 818                                                                                                              |
| Licensed Content Issue       | n/a                                                                                                              |
| Licensed Content Pages       | 8                                                                                                                |
| Start Page                   | 449                                                                                                              |
| End Page                     | 456                                                                                                              |
| Type of Use                  | reuse in a journal/magazine                                                                                      |

|                                              |                                                                                                                                                                         |
|----------------------------------------------|-------------------------------------------------------------------------------------------------------------------------------------------------------------------------|
| Requestor type                               | academic/educational institute                                                                                                                                          |
| Portion                                      | figures/tables/illustrations                                                                                                                                            |
| Number of figures/tables/illustrations       | 1                                                                                                                                                                       |
| Format                                       | both print and electronic                                                                                                                                               |
| Are you the author of this Elsevier article? | No                                                                                                                                                                      |
| Will you be translating?                     | No                                                                                                                                                                      |
| Title of new article                         | Small animal models of fibrosis in non-alcoholic steatohepatitis: are they reflecting human disease?                                                                    |
| Lead author                                  | David Højland Ipsen                                                                                                                                                     |
| Title of targeted journal                    | Advances in Nutrition                                                                                                                                                   |
| Publisher                                    | Oxford University Press                                                                                                                                                 |
| Expected publication date                    | Jun 2020                                                                                                                                                                |
| Portions                                     | Subset of Figure 2 A, page 452; "Sirius Red" panel, Only the 3. image from the top displaying detail of liver tissue. The remaining part of Figure 2A will be excluded. |
| Requestor Location                           | University of Copenhagen<br>Ridebanevej 9<br>Frederiksberg, Hovedstaden 1870<br>Denmark<br>Attn: University of Copenhagen                                               |
| Publisher Tax ID                             | GB 494 6272 12                                                                                                                                                          |
| Total                                        | 0.00 EUR                                                                                                                                                                |
| Terms and Conditions                         |                                                                                                                                                                         |

## INTRODUCTION

1. The publisher for this copyrighted material is Elsevier. By clicking "accept" in connection with completing this licensing transaction, you agree that the following terms and conditions apply to this transaction (along with the Billing and Payment terms and conditions established by Copyright Clearance Center, Inc. ("CCC"), at the time that you opened your Rightslink account and that are available at any time at <http://myaccount.copyright.com>).

## GENERAL TERMS

2. Elsevier hereby grants you permission to reproduce the aforementioned material subject to the terms and conditions indicated.

3. Acknowledgement: If any part of the material to be used (for example, figures) has appeared in our publication with credit or acknowledgement to another source, permission must also be sought from that source. If such permission is not obtained then that material may not be included in your publication/copies. Suitable acknowledgement to the source must be made, either as a footnote or in a reference list at the end of your publication, as follows:

"Reprinted from Publication title, Vol /edition number, Author(s), Title of article / title of chapter, Pages No., Copyright (Year), with permission from Elsevier [OR APPLICABLE SOCIETY COPYRIGHT OWNER]." Also Lancet special credit - "Reprinted from The Lancet, Vol. number, Author(s), Title of article, Pages No., Copyright (Year), with permission from Elsevier."

4. Reproduction of this material is confined to the purpose and/or media for which permission is hereby given.

5. Altering/Modifying Material: Not Permitted. However figures and illustrations may be altered/adapted minimally to serve your work. Any other abbreviations, additions, deletions and/or any other alterations shall be made only with prior written authorization of Elsevier Ltd. (Please contact Elsevier at [permissions@elsevier.com](mailto:permissions@elsevier.com)). No modifications can be made to any Lancet figures/tables and they must be reproduced in full.

6. If the permission fee for the requested use of our material is waived in this instance, please be advised that your future requests for Elsevier materials may attract a fee.

7. Reservation of Rights: Publisher reserves all rights not specifically granted in the combination of (i) the license details provided by you and accepted in the course of this licensing transaction, (ii) these terms and conditions and (iii) CCC's Billing and Payment terms and conditions.

8. License Contingent Upon Payment: While you may exercise the rights licensed immediately upon issuance of the license at the end of the licensing process for the transaction, provided that you have disclosed complete and accurate details of your proposed use, no license is finally effective unless and until full payment is received from you (either by publisher or by CCC) as provided in CCC's Billing and Payment terms and conditions. If full payment is not received on a timely basis, then any license preliminarily granted shall be deemed automatically revoked and shall be void as if never granted. Further, in the event that you breach any of these terms and conditions or any of CCC's Billing and Payment terms and conditions, the license is automatically revoked and shall be void as if never granted. Use of materials as described in a revoked license, as well as any use of the materials beyond the scope of an unrevoked license, may constitute copyright infringement and publisher reserves the right to take any and all action to protect its copyright in the materials.

9. Warranties: Publisher makes no representations or warranties with respect to the licensed material.

10. **Indemnity:** You hereby indemnify and agree to hold harmless publisher and CCC, and their respective officers, directors, employees and agents, from and against any and all claims arising out of your use of the licensed material other than as specifically authorized pursuant to this license.

11. **No Transfer of License:** This license is personal to you and may not be sublicensed, assigned, or transferred by you to any other person without publisher's written permission.

12. **No Amendment Except in Writing:** This license may not be amended except in a writing signed by both parties (or, in the case of publisher, by CCC on publisher's behalf).

13. **Objection to Contrary Terms:** Publisher hereby objects to any terms contained in any purchase order, acknowledgment, check endorsement or other writing prepared by you, which terms are inconsistent with these terms and conditions or CCC's Billing and Payment terms and conditions. These terms and conditions, together with CCC's Billing and Payment terms and conditions (which are incorporated herein), comprise the entire agreement between you and publisher (and CCC) concerning this licensing transaction. In the event of any conflict between your obligations established by these terms and conditions and those established by CCC's Billing and Payment terms and conditions, these terms and conditions shall control.

14. **Revocation:** Elsevier or Copyright Clearance Center may deny the permissions described in this License at their sole discretion, for any reason or no reason, with a full refund payable to you. Notice of such denial will be made using the contact information provided by you. Failure to receive such notice will not alter or invalidate the denial. In no event will Elsevier or Copyright Clearance Center be responsible or liable for any costs, expenses or damage incurred by you as a result of a denial of your permission request, other than a refund of the amount(s) paid by you to Elsevier and/or Copyright Clearance Center for denied permissions.

### LIMITED LICENSE

The following terms and conditions apply only to specific license types:

15. **Translation:** This permission is granted for non-exclusive world **English** rights only unless your license was granted for translation rights. If you licensed translation rights you may only translate this content into the languages you requested. A professional translator must perform all translations and reproduce the content word for word preserving the integrity of the article.

16. **Posting licensed content on any Website:** The following terms and conditions apply as follows: Licensing material from an Elsevier journal: All content posted to the web site must maintain the copyright information line on the bottom of each image; A hyper-text must be included to the Homepage of the journal from which you are licensing at <http://www.sciencedirect.com/science/journal/xxxxx> or the Elsevier homepage for books at <http://www.elsevier.com>; Central Storage: This license does not include permission for a scanned version of the material to be stored in a central repository such as that provided by Heron/XanEdu.

Licensing material from an Elsevier book: A hyper-text link must be included to the Elsevier homepage at <http://www.elsevier.com>. All content posted to the web site must maintain the copyright information line on the bottom of each image.

**Posting licensed content on Electronic reserve:** In addition to the above the following clauses are applicable: The web site must be password-protected and made available only to bona fide students registered on a relevant course. This permission is granted for 1 year only. You may obtain a new license for future website posting.

17. **For journal authors:** the following clauses are applicable in addition to the above:

### **Preprints:**

A preprint is an author's own write-up of research results and analysis, it has not been peer-reviewed, nor has it had any other value added to it by a publisher (such as formatting, copyright, technical enhancement etc.).

Authors can share their preprints anywhere at any time. Preprints should not be added to or enhanced in any way in order to appear more like, or to substitute for, the final versions of articles however authors can update their preprints on arXiv or RePEc with their Accepted Author Manuscript (see below).

If accepted for publication, we encourage authors to link from the preprint to their formal publication via its DOI. Millions of researchers have access to the formal publications on ScienceDirect, and so links will help users to find, access, cite and use the best available version. Please note that Cell Press, The Lancet and some society-owned have different preprint policies. Information on these policies is available on the journal homepage.

**Accepted Author Manuscripts:** An accepted author manuscript is the manuscript of an article that has been accepted for publication and which typically includes author-incorporated changes suggested during submission, peer review and editor-author communications.

Authors can share their accepted author manuscript:

- immediately
  - via their non-commercial person homepage or blog
  - by updating a preprint in arXiv or RePEc with the accepted manuscript
  - via their research institute or institutional repository for internal institutional uses or as part of an invitation-only research collaboration work-group
  - directly by providing copies to their students or to research collaborators for their personal use
  - for private scholarly sharing as part of an invitation-only work group on commercial sites with which Elsevier has an agreement
- After the embargo period
  - via non-commercial hosting platforms such as their institutional repository
  - via commercial sites with which Elsevier has an agreement

In all cases accepted manuscripts should:

- link to the formal publication via its DOI
- bear a CC-BY-NC-ND license - this is easy to do
- if aggregated with other manuscripts, for example in a repository or other site, be shared in alignment with our hosting policy not be added to or enhanced in any way to appear more like, or to substitute for, the published journal article.

**Published journal article (JPA):** A published journal article (PJA) is the definitive final record of published research that appears or will appear in the journal and embodies all value-adding publishing activities including peer review co-ordination, copy-editing, formatting, (if relevant) pagination and online enrichment.

Policies for sharing publishing journal articles differ for subscription and gold open access articles:

**Subscription Articles:** If you are an author, please share a link to your article rather than the full-text. Millions of researchers have access to the formal publications on ScienceDirect, and so links will help your users to find, access, cite, and use the best available version.

Theses and dissertations which contain embedded PJAs as part of the formal submission can be posted publicly by the awarding institution with DOI links back to the formal publications on ScienceDirect.

If you are affiliated with a library that subscribes to ScienceDirect you have additional private sharing rights for others' research accessed under that agreement. This includes use for classroom teaching and internal training at the institution (including use in course packs and courseware programs), and inclusion of the article for grant funding purposes.

**Gold Open Access Articles:** May be shared according to the author-selected end-user license and should contain a [CrossMark logo](#), the end user license, and a DOI link to the formal publication on ScienceDirect.

Please refer to Elsevier's [posting policy](#) for further information.

**18. For book authors** the following clauses are applicable in addition to the above: Authors are permitted to place a brief summary of their work online only. You are not allowed to download and post the published electronic version of your chapter, nor may you scan the printed edition to create an electronic version. **Posting to a repository:** Authors are permitted to post a summary of their chapter only in their institution's repository.

**19. Thesis/Dissertation:** If your license is for use in a thesis/dissertation your thesis may be submitted to your institution in either print or electronic form. Should your thesis be published commercially, please reapply for permission. These requirements include permission for the Library and Archives of Canada to supply single copies, on demand, of the complete thesis and include permission for Proquest/UMI to supply single copies, on demand, of the complete thesis. Should your thesis be published commercially, please reapply for permission. Theses and dissertations which contain embedded PJAs as part of the formal submission can be posted publicly by the awarding institution with DOI links back to the formal publications on ScienceDirect.

### **Elsevier Open Access Terms and Conditions**

You can publish open access with Elsevier in hundreds of open access journals or in nearly 2000 established subscription journals that support open access publishing. Permitted third party re-use of these open access articles is defined by the author's choice of Creative Commons user license. See our [open access license policy](#) for more information.

#### **Terms & Conditions applicable to all Open Access articles published with Elsevier:**

Any reuse of the article must not represent the author as endorsing the adaptation of the article nor should the article be modified in such a way as to damage the author's honour or reputation. If any changes have been made, such changes must be clearly indicated.

The author(s) must be appropriately credited and we ask that you include the end user license and a DOI link to the formal publication on ScienceDirect.

If any part of the material to be used (for example, figures) has appeared in our publication with credit or acknowledgement to another source it is the responsibility of the user to ensure their reuse complies with the terms and conditions determined by the rights holder.

#### **Additional Terms & Conditions applicable to each Creative Commons user license:**

**CC BY:** The CC-BY license allows users to copy, to create extracts, abstracts and new works from the Article, to alter and revise the Article and to make commercial use of the Article (including reuse and/or resale of the Article by commercial entities), provided the user gives appropriate credit (with a link to the formal publication through the relevant



DOI), provides a link to the license, indicates if changes were made and the licensor is not represented as endorsing the use made of the work. The full details of the license are available at <http://creativecommons.org/licenses/by/4.0>.

**CC BY NC SA:** The CC BY-NC-SA license allows users to copy, to create extracts, abstracts and new works from the Article, to alter and revise the Article, provided this is not done for commercial purposes, and that the user gives appropriate credit (with a link to the formal publication through the relevant DOI), provides a link to the license, indicates if changes were made and the licensor is not represented as endorsing the use made of the work. Further, any new works must be made available on the same conditions. The full details of the license are available at <http://creativecommons.org/licenses/by-nc-sa/4.0>.

**CC BY NC ND:** The CC BY-NC-ND license allows users to copy and distribute the Article, provided this is not done for commercial purposes and further does not permit distribution of the Article if it is changed or edited in any way, and provided the user gives appropriate credit (with a link to the formal publication through the relevant DOI), provides a link to the license, and that the licensor is not represented as endorsing the use made of the work. The full details of the license are available at <http://creativecommons.org/licenses/by-nc-nd/4.0>. Any commercial reuse of Open Access articles published with a CC BY NC SA or CC BY NC ND license requires permission from Elsevier and will be subject to a fee.

Commercial reuse includes:

- Associating advertising with the full text of the Article
- Charging fees for document delivery or access
- Article aggregation
- Systematic distribution via e-mail lists or share buttons

Posting or linking by commercial companies for use by customers of those companies.

## 20. Other Conditions:

v1.9

Questions? [customercare@copyright.com](mailto:customercare@copyright.com) or +1-855-239-3415 (toll free in the US) or +1-978-646-2777.

---

---
